# Supplementary material for: Identification and functional analysis of LecRLK genes in Taxodium ‘Zhongshanshan’
Source: PeerJ. 2019 Aug 13;7:e7498. doi: 10.7717/peerj.7498 (PMC6697044; doi:10.7717/peerj.7498)
Supplement: File S8 [file peerj-07-7498-s008.xlsx]

## Sheet: Sheet1
ID	Psort software	CELLO software9 (reliable-index > 1)	Same result
SeqID: ThzLecRLK-C-type-1	plas:11.5,golg_plas:7,golg:1.5,E.R.:1	PlasmaMembrane	PlasmaMembrane
SeqID: ThzLecRLK-C-type-2	plas:9,vacu液泡:3,E.R.:1,golg:1	PlasmaMembrane Chloroplast	PlasmaMembrane Chloroplast
SeqID: ThzLecRLK-G-type-1	chlo:5,extr:3,nucl:2,vacu:2,cyto:1,plas:1	PlasmaMembrane	PlasmaMembrane
SeqID: ThzLecRLK-G-type-2	plas:9.5,golg_plas:6.5,golg:2.5,vacu:2	PlasmaMembrane	PlasmaMembrane
SeqID: ThzLecRLK-G-type-3	chlo:5,E.R.:3,nucl:2.5,plas:2,cysk_nucl:2,mito:1	PlasmaMembrane	PlasmaMembrane
SeqID: ThzLecRLK-G-type-4	plas:6.5,golg_plas:5,vacu:4,golg:2.5,E.R.:1	PlasmaMembrane	PlasmaMembrane
SeqID: ThzLecRLK-G-type-5	plas:11.5,golg_plas:7,golg:1.5,vacu:1	PlasmaMembrane	PlasmaMembrane
SeqID: ThzLecRLK-G-type-6	extr:4,vacu:2,E.R.:2,golg:2,chlo:1,nucl:1,mito:1,plas:1	PlasmaMembrane	PlasmaMembrane
SeqID: ThzLecRLK-G-type-7	plas:7.5,golg_plas:5.5,vacu:3,golg:2.5,chlo:1	PlasmaMembrane	PlasmaMembrane
SeqID: ThzLecRLK-G-type-8	plas:4.5,vacu:4,golg_plas:4,golg:2.5,E.R.:2,nucl:1	PlasmaMembrane	PlasmaMembrane
SeqID: ThzLecRLK-G-type-9	nucl:5,cyto:5,vacu:2,plas:1,E.R.:1	PlasmaMembrane	PlasmaMembrane
SeqID: ThzLecRLK-G-type-10	nucl:3.5,chlo:3,cysk_nucl:2.5,plas:2,E.R.:2,cyto:1,mito:1,vacu:1	PlasmaMembrane	PlasmaMembrane
SeqID: ThzLecRLK-G-type-11	plas:10,E.R.:2,nucl:1,vacu:1	PlasmaMembrane	PlasmaMembrane
SeqID: ThzLecRLK-G-type-12	plas:8.5,golg_plas:6,golg:2.5,vacu:2,E.R.:1	PlasmaMembrane	PlasmaMembrane
SeqID: ThzLecRLK-G-type-13	chlo:5,nucl:2,E.R.:2,cyto:1,mito:1,plas:1,extr:1,vacu:1	PlasmaMembrane	PlasmaMembrane
SeqID: ThzLecRLK-G-type-14	chlo:12,nucl:1,vacu:1	PlasmaMembrane
SeqID: ThzLecRLK-G-type-15	plas:8.5,golg_plas:6.5,golg:3.5,vacu:2	PlasmaMembrane	PlasmaMembrane
SeqID: ThzLecRLK-G-type-16	nucl:4,E.R.:3,cyto:2,vacu:2,chlo:1,mito:1,plas:1	PlasmaMembrane Nuclear	PlasmaMembrane Nuclear
SeqID: ThzLecRLK-G-type-17	plas:7.5,golg_plas:6,golg:3.5,vacu:2,E.R.:1	PlasmaMembrane	PlasmaMembrane
SeqID: ThzLecRLK-G-type-18	vacu:5,chlo:4,extr:2,golg:2,nucl:1	PlasmaMembrane
SeqID: ThzLecRLK-G-type-19	E.R.:6,cyto:3,chlo:2,nucl:2,mito:1	PlasmaMembrane
SeqID: ThzLecRLK-G-type-20	plas:7.5,golg_plas:6,golg:3.5,vacu:2,E.R.:1	PlasmaMembrane	PlasmaMembrane
SeqID: ThzLecRLK-G-type-21	plas:8.5,golg_plas:6.5,golg:3.5,vacu:1,E.R.:1	PlasmaMembrane	PlasmaMembrane
SeqID: ThzLecRLK-G-type-22	plas:8.5,golg_plas:6.5,golg:3.5,chlo:1,vacu:1	PlasmaMembrane	PlasmaMembrane
SeqID: ThzLecRLK-G-type-23	plas:8.5,golg_plas:6.5,golg:3.5,vacu:1,E.R.:1	PlasmaMembrane	PlasmaMembrane
SeqID: ThzLecRLK-G-type-24	plas:7.5,golg_plas:6,golg:3.5,chlo:1,nucl:1,vacu:1	PlasmaMembrane	PlasmaMembrane
SeqID: ThzLecRLK-G-type-25	plas:8.5,golg_plas:6.5,golg:3.5,vacu:2	PlasmaMembrane	PlasmaMembrane
SeqID: ThzLecRLK-G-type-26	plas:6.5,golg_plas:5.5,golg:3.5,vacu:3,E.R.:1	PlasmaMembrane	PlasmaMembrane
SeqID: ThzLecRLK-G-type-27	plas:8.5,golg_plas:6.5,golg:3.5,vacu:1,E.R.:1	PlasmaMembrane	PlasmaMembrane
SeqID: ThzLecRLK-G-type-28	plas:8.5,golg_plas:6.5,golg:3.5,vacu:2	PlasmaMembrane	PlasmaMembrane
SeqID: ThzLecRLK-G-type-29	plas:7,vacu:4,E.R.:2,golg:1	PlasmaMembrane Cytoplasmic	PlasmaMembrane
SeqID: ThzLecRLK-G-type-30	plas:8,vacu:4,E.R.:1,golg:1	PlasmaMembrane	PlasmaMembrane
SeqID: ThzLecRLK-G-type-31	extr:4,vacu:3,nucl:2,E.R.:2,golg:2,plas:1	PlasmaMembrane	PlasmaMembrane
SeqID: ThzLecRLK-G-type-32	extr:4,golg:3,vacu:2,chlo:1,nucl:1,mito:1,plas:1,E.R.:1	PlasmaMembrane	PlasmaMembrane
SeqID: ThzLecRLK-G-type-33	plas:9,chlo:2,E.R.:2,nucl:1	PlasmaMembrane	PlasmaMembrane
SeqID: ThzLecRLK-G-type-34	vacu:5,golg:4,plas:2,extr:2,nucl:1	Cytoplasmic
SeqID: ThzLecRLK-G-type-35	extr:4,golg:3,vacu:2,E.R.:2,chlo:1,nucl:1,plas:1	PlasmaMembrane	PlasmaMembrane
SeqID: ThzLecRLK-G-type-36	extr:4,vacu:2,E.R.:2,golg:2,chlo:1,nucl:1,mito:1,plas:1	PlasmaMembrane	PlasmaMembrane
SeqID: ThzLecRLK-G-type-37	nucl:4.5,chlo:3,cysk_nucl:3,E.R.:2,cyto:1,mito:1,plas:1,vacu:1	Cytoplasmic	Cytoplasmic
SeqID: ThzLecRLK-G-type-38	plas:7.5,golg_plas:6,golg:3.5,E.R.:2,vacu:1	PlasmaMembrane	PlasmaMembrane
SeqID: ThzLecRLK-G-type-39	vacu:5,extr:2,E.R.:2,golg:2,chlo:1,mito:1,plas:1	PlasmaMembrane	PlasmaMembrane
SeqID: ThzLecRLK-G-type-40	E.R.:5,nucl:3,plas:2,chlo:1,cyto:1,mito:1,extr:1	Extracellular Nuclear	Extracellular Nuclear
SeqID: ThzLecRLK-G-type-41	plas:4.5,golg_plas:4.5,golg:3.5,vacu:3,E.R.:2,chlo:1	PlasmaMembrane Extracellular	PlasmaMembrane
SeqID: ThzLecRLK-G-type-42	extr:5,vacu:3,chlo:2,mito:2,nucl:1,golg:1	PlasmaMembrane
SeqID: ThzLecRLK-G-type-43	extr:4,vacu:3,plas:2,golg:2,chlo:1,nucl:1,mito:1	PlasmaMembrane	PlasmaMembrane
SeqID: ThzLecRLK-G-type-44	plas:5.5,golg_plas:5,vacu:4,golg:3.5,E.R.:1	PlasmaMembrane	PlasmaMembrane
SeqID: ThzLecRLK-G-type-45	plas:8.5,golg_plas:6,vacu:3,golg:2.5	PlasmaMembrane	PlasmaMembrane
SeqID: ThzLecRLK-G-type-46	plas:6.5,golg_plas:5.5,golg:3.5,vacu:3,E.R.:1	PlasmaMembrane	PlasmaMembrane
SeqID: ThzLecRLK-G-type-47	plas:7.5,golg_plas:6,golg:3.5,E.R.:2,vacu:1	PlasmaMembrane	PlasmaMembrane
SeqID: ThzLecRLK-G-type-48	plas:6.5,golg_plas:5.5,golg:3.5,vacu:3,E.R.:1	PlasmaMembrane	PlasmaMembrane
SeqID: ThzLecRLK-G-type-49	plas:8.5,golg_plas:6,golg:2.5,vacu:2,E.R.:1	PlasmaMembrane Cytoplasmic	PlasmaMembrane
SeqID: ThzLecRLK-G-type-50	plas:10,vacu:3,E.R.:1	PlasmaMembrane	PlasmaMembrane
SeqID: ThzLecRLK-G-type-51	plas:9,vacu:3,golg:2	PlasmaMembrane	PlasmaMembrane
SeqID: ThzLecRLK-G-type-52	plas:7,E.R.:3,vacu:2,chlo:1,pero:1	PlasmaMembrane	PlasmaMembrane
SeqID: ThzLecRLK-G-type-53	plas:6,vacu:3,E.R.:3,chlo:1,pero:1	PlasmaMembrane	PlasmaMembrane
SeqID: ThzLecRLK-G-type-54	plas:10,nucl:2,vacu:1,E.R.:1	PlasmaMembrane	PlasmaMembrane
SeqID: ThzLecRLK-G-type-55	plas:9.5,golg_plas:6,vacu:2,golg:1.5,nucl:1	PlasmaMembrane	PlasmaMembrane
SeqID: ThzLecRLK-G-type-56	nucl:4,cyto:4,vacu:2,E.R.:2,mito:1,plas:1	PlasmaMembrane	PlasmaMembrane
SeqID: ThzLecRLK-G-type-57	plas:8.5,golg_plas:6.5,golg:3.5,vacu:1,E.R.:1	PlasmaMembrane	PlasmaMembrane
SeqID: ThzLecRLK-G-type-58	chlo:3,nucl:3,cyto:2,E.R.:2,mito:1,plas:1,extr:1,vacu:1	PlasmaMembrane	PlasmaMembrane
SeqID: ThzLecRLK-G-type-59	E.R.:3.5,E.R._plas:3,extr:2,vacu:2,golg:2,plas:1.5,chlo:1,nucl:1,mito:1	Extracellular PlasmaMembrane	PlasmaMembrane Extracellular
SeqID: ThzLecRLK-G-type-60	E.R.:4.5,E.R._plas:4,plas:2.5,nucl:2,cyto:2,mito:1,extr:1,vacu:1	PlasmaMembrane	PlasmaMembrane
SeqID: ThzLecRLK-G-type-61	plas:6.5,golg_plas:5.5,golg:3.5,vacu:2,E.R.:2	PlasmaMembrane	PlasmaMembrane
SeqID: ThzLecRLK-G-type-62	chlo:6,cyto:2,plas:2,E.R.:2,nucl:1,vacu:1	PlasmaMembrane	PlasmaMembrane
SeqID: ThzLecRLK-G-type-63	plas:9,vacu:4,golg:1	PlasmaMembrane	PlasmaMembrane
SeqID: ThzLecRLK-G-type-64	chlo:3,nucl:2,cyto:2,vacu:2,E.R.:2,mito:1,plas:1,extr:1	PlasmaMembrane	PlasmaMembrane
SeqID: ThzLecRLK-G-type-65	extr:3,E.R.:2.5,E.R._plas:2.5,vacu:2,golg:2,plas:1.5,chlo:1,nucl:1,mito:1	PlasmaMembrane Extracellular	PlasmaMembrane Extracellular
SeqID: ThzLecRLK-G-type-66	nucl:4,cyto:4,vacu:2,E.R._plas:2,plas:1.5,E.R.:1.5,mito:1	PlasmaMembrane Lysosoma	PlasmaMembrane
SeqID: ThzLecRLK-G-type-67	E.R.:4.5,E.R._plas:4.5,plas:3.5,nucl:2,cyto:2,mito:1,extr:1	PlasmaMembrane	PlasmaMembrane
SeqID: ThzLecRLK-G-type-68	nucl:4,chlo:3,extr:3,vacu:2,cyto:1,golg:1	PlasmaMembrane
SeqID: ThzLecRLK-G-type-69	nucl:3.5,chlo:3,E.R.:3,cysk_nucl:2.5,plas:2,cyto:1,vacu:1	PlasmaMembrane	PlasmaMembrane
SeqID: ThzLecRLK-G-type-70	nucl:5,cyto:4,vacu:2,E.R.:2,mito:1	PlasmaMembrane
SeqID: ThzLecRLK-G-type-71	plas:8,nucl:4,E.R.:2	PlasmaMembrane	PlasmaMembrane
SeqID: ThzLecRLK-G-type-72	cyto:4,chlo:2,plas:2,E.R.:2,nucl:1,mito:1,extr:1,vacu:1	PlasmaMembrane	PlasmaMembrane
SeqID: ThzLecRLK-G-type-73	extr:3,E.R.:2.5,E.R._plas:2.5,vacu:2,golg:2,plas:1.5,chlo:1,nucl:1,mito:1	Extracellular PlasmaMembrane	PlasmaMembrane Extracellular
SeqID: ThzLecRLK-G-type-74	E.R.:4.5,E.R._plas:3.5,extr:3,golg:2,plas:1.5,chlo:1,cyto:1,mito:1	PlasmaMembrane	PlasmaMembrane
SeqID: ThzLecRLK-G-type-75	plas:6,vacu:4,nucl:2,extr:1,E.R.:1	PlasmaMembrane	PlasmaMembrane
SeqID: ThzLecRLK-G-type-76	plas:8.5,golg_plas:6.5,golg:3.5,vacu:1,E.R.:1	PlasmaMembrane	PlasmaMembrane
SeqID: ThzLecRLK-G-type-77	plas:8.5,golg_plas:6.5,golg:3.5,vacu:1,E.R.:1	PlasmaMembrane	PlasmaMembrane
SeqID: ThzLecRLK-G-type-78	chlo:4,nucl:3,extr:3,vacu:2,cyto:1,plas:1	PlasmaMembrane	PlasmaMembrane
SeqID: ThzLecRLK-G-type-79	plas:7,chlo:2,mito:2,E.R.:2,pero:1	PlasmaMembrane	PlasmaMembrane
SeqID: ThzLecRLK-G-type-80	plas:7.5,golg_plas:6,golg:3.5,vacu:3	PlasmaMembrane	PlasmaMembrane
SeqID: ThzLecRLK-G-type-81	vacu:6,extr:3,golg:2,nucl:1,mito:1,plas:1	PlasmaMembrane	PlasmaMembrane
SeqID: ThzLecRLK-G-type-82	plas:11,E.R.:2,nucl:1	PlasmaMembrane	PlasmaMembrane
SeqID: ThzLecRLK-G-type-83	plas:6,vacu:4,E.R.:2,nucl:1,extr:1	Extracellular	Extracellular
SeqID: ThzLecRLK-G-type-84	nucl:12,extr:2	PlasmaMembrane
SeqID: ThzLecRLK-G-type-85	plas:6.5,golg_plas:5.5,golg:3.5,vacu:3,E.R.:1	PlasmaMembrane	PlasmaMembrane
SeqID: ThzLecRLK-G-type-86	E.R.:6.5,E.R._plas:5,plas:2.5,nucl:2,chlo:1,mito:1,vacu:1	PlasmaMembrane	PlasmaMembrane
SeqID: ThzLecRLK-G-type-87	nucl:4,cyto:4,E.R.:3,chlo:1,mito:1,vacu:1	PlasmaMembrane Mitochondrial	PlasmaMembrane Mitochondrial
SeqID: ThzLecRLK-G-type-88	nucl:2,cyto:2,extr:2,vacu:2,E.R.:2,golg:2,chlo:1,plas:1	PlasmaMembrane	PlasmaMembrane
SeqID: ThzLecRLK-G-type-89	vacu:5,chlo:2,golg:2,nucl:1,cyto:1,mito:1,plas:1,extr:1	PlasmaMembrane	PlasmaMembrane
SeqID: ThzLecRLK-G-type-90	vacu:4,extr:3,E.R.:2,golg:2,chlo:1,nucl:1,plas:1	PlasmaMembrane	PlasmaMembrane
SeqID: ThzLecRLK-G-type-91	plas:6,vacu:3,E.R.:2,nucl:1,cyto:1,extr:1	PlasmaMembrane	PlasmaMembrane
SeqID: ThzLecRLK-G-type-92	plas:6,nucl:4,E.R.:3,chlo:1	PlasmaMembrane	PlasmaMembrane
SeqID: ThzLecRLK-G-type-93	plas:7,nucl:2,E.R.:2,golg:2,chlo:1	PlasmaMembrane Extracellular	PlasmaMembrane
SeqID: ThzLecRLK-G-type-94	plas:6,E.R.:3,nucl:2,vacu:2,cyto:1	PlasmaMembrane	PlasmaMembrane
SeqID: ThzLecRLK-G-type-95	vacu:7,golg:3,extr:2,nucl:1,plas:1	PlasmaMembrane	PlasmaMembrane
SeqID: ThzLecRLK-G-type-96	plas:10.5,golg_plas:6.5,vacu:2,golg:1.5	PlasmaMembrane	PlasmaMembrane
SeqID: ThzLecRLK-G-type-97	plas:8,nucl:2,E.R.:2,vacu:1,golg:1	PlasmaMembrane	PlasmaMembrane
SeqID: ThzLecRLK-G-type-98	plas:8.5,golg_plas:6,golg:2.5,vacu:2,E.R.:1	PlasmaMembrane	PlasmaMembrane
SeqID: ThzLecRLK-G-type-99	cyto:5,nucl:3,E.R.:2.5,E.R._plas:2.5,plas:1.5,mito:1,vacu:1	PlasmaMembrane	PlasmaMembrane
SeqID: ThzLecRLK-G-type-100	plas:9.5,golg_plas:7,golg:3.5,E.R.:1	PlasmaMembrane Extracellular	PlasmaMembrane
SeqID: ThzLecRLK-G-type-101	vacu:6,plas:4,E.R.:2,golg:2	PlasmaMembrane	PlasmaMembrane
SeqID: ThzLecRLK-G-type-102	cyto:4,E.R.:3,chlo:2,nucl:2,golg:2,mito:1	PlasmaMembrane
SeqID: ThzLecRLK-G-type-103	plas:6,vacu:3,E.R.:3,chlo:1,pero:1	PlasmaMembrane	PlasmaMembrane
SeqID: ThzLecRLK-G-type-104	plas:9.5,golg_plas:6.5,golg:2.5,vacu:2	PlasmaMembrane	PlasmaMembrane
SeqID: ThzLecRLK-G-type-105	pero:7,E.R.:3,plas:2,chlo:1,vacu:1	PlasmaMembrane	PlasmaMembrane
SeqID: ThzLecRLK-G-type-106	nucl:4,E.R.:3,cyto:2,plas:2,chlo:1,mito:1,golg:1	Nuclear	Nuclear
SeqID: ThzLecRLK-G-type-107	plas:8,E.R.:2,golg:2,chlo:1,nucl:1	PlasmaMembrane	PlasmaMembrane
SeqID: ThzLecRLK-G-type-108	plas:8,vacu:2,E.R.:2,golg:2	PlasmaMembrane	PlasmaMembrane
SeqID: ThzLecRLK-G-type-109	cyto:5,E.R.:3,nucl:2,chlo:1,mito:1,plas:1,vacu:1	PlasmaMembrane	PlasmaMembrane
SeqID: ThzLecRLK-G-type-110	plas:6.5,golg_plas:4,E.R.:3,chlo:1,nucl:1,mito:1,vacu:1	PlasmaMembrane	PlasmaMembrane
SeqID: ThzLecRLK-G-type-111	cyto:4,plas:3.5,E.R._plas:3.5,nucl:3,E.R.:2.5,mito:1	PlasmaMembrane	PlasmaMembrane
SeqID: ThzLecRLK-G-type-112	plas:9,vacu:3,nucl:2	PlasmaMembrane	PlasmaMembrane
SeqID: ThzLecRLK-G-type-113	cyto:4,nucl:3,chlo:2,mito:2,plas:1,extr:1,E.R.:1	PlasmaMembrane	PlasmaMembrane
SeqID: ThzLecRLK-G-type-114	vacu:5,golg:4,extr:2,chlo:1,nucl:1,plas:1	Extracellular	Extracellular
SeqID: ThzLecRLK-G-type-115	plas:6,vacu:3,E.R.:3,chlo:1,pero:1	PlasmaMembrane	PlasmaMembrane
SeqID: ThzLecRLK-G-type-116	plas:7.5,golg_plas:6,golg:3.5,vacu:2,E.R.:1	PlasmaMembrane	PlasmaMembrane
SeqID: ThzLecRLK-G-type-117	plas:7.5,golg_plas:5,vacu:4,golg:1.5,E.R.:1	PlasmaMembrane Extracellular	PlasmaMembrane
SeqID: ThzLecRLK-G-type-118	E.R.:4,cyto:3,nucl:2,vacu:2,chlo:1,mito:1,plas:1	PlasmaMembrane	PlasmaMembrane
SeqID: ThzLecRLK-G-type-119	plas:9.5,golg_plas:7,golg:3.5,E.R.:1	PlasmaMembrane	PlasmaMembrane
SeqID: ThzLecRLK-G-type-120	plas:8.5,golg_plas:6.5,golg:3.5,vacu:1,E.R.:1	PlasmaMembrane	PlasmaMembrane
SeqID: ThzLecRLK-G-type-121	vacu:5,mito:2,extr:2,golg:2,chlo:1,nucl:1,plas:1	PlasmaMembrane	PlasmaMembrane
SeqID: ThzLecRLK-G-type-122	vacu:6,golg:3,chlo:2,plas:2,extr:1	PlasmaMembrane	PlasmaMembrane
SeqID: ThzLecRLK-G-type-123	plas:7.5,golg_plas:5.5,golg:2.5,vacu:2,E.R.:2	PlasmaMembrane	PlasmaMembrane
SeqID: ThzLecRLK-G-type-124	nucl:4,cyto:3,E.R.:3,vacu:2,chlo:1,mito:1	Nuclear	Nuclear
SeqID: ThzLecRLK-G-type-125	nucl:4,cyto:3,E.R.:3,vacu:2,chlo:1,mito:1	Nuclear	Nuclear
SeqID: ThzLecRLK-G-type-126	plas:7.5,golg_plas:6,golg:3.5,E.R.:2,vacu:1	PlasmaMembrane	PlasmaMembrane
SeqID: ThzLecRLK-G-type-127	cyto:4,E.R.:4,nucl:2,vacu:2,chlo:1,mito:1	PlasmaMembrane
SeqID: ThzLecRLK-G-type-128	E.R.:5,nucl:4,cyto:2,chlo:1,mito:1,plas:1	PlasmaMembrane	PlasmaMembrane
SeqID: ThzLecRLK-G-type-129	nucl:4,E.R.:4,cyto:3,chlo:1,mito:1,extr:1	PlasmaMembrane
SeqID: ThzLecRLK-G-type-130	nucl:3,E.R.:3,chlo:2,cyto:2,plas:2,mito:1,vacu:1	Extracellular Nuclear	Nuclear
SeqID: ThzLecRLK-G-type-131	nucl:4,cyto:3,E.R.:3,vacu:2,chlo:1,mito:1	Nuclear	Nuclear
SeqID: ThzLecRLK-G-type-132	nucl:4,cyto:3,E.R.:3,vacu:2,chlo:1,mito:1	PlasmaMembrane
SeqID: ThzLecRLK-G-type-133	E.R.:4,nucl:3,chlo:2,cyto:2,mito:1,plas:1,vacu:1	Nuclear Extracellular PlasmaMembrane	PlasmaMembrane Nuclear
SeqID: ThzLecRLK-G-type-134	E.R.:5,nucl:4,cyto:2,chlo:1,mito:1,plas:1	Nuclear	Nuclear
SeqID: ThzLecRLK-G-type-135	plas:7,vacu:3,nucl:2,chlo:1,extr:1	PlasmaMembrane	PlasmaMembrane
SeqID: ThzLecRLK-G-type-136	plas:7,E.R.:2,golg:2,chlo:1,nucl:1,vacu:1	PlasmaMembrane Cytoplasmic Extracellular	PlasmaMembrane
SeqID: ThzLecRLK-G-type-137	plas:7.5,golg_plas:6,golg:3.5,E.R.:2,vacu:1	PlasmaMembrane	PlasmaMembrane
SeqID: ThzLecRLK-G-type-138	plas:8,vacu:4,E.R.:1,golg:1	PlasmaMembrane	PlasmaMembrane
SeqID: ThzLecRLK-G-type-139	plas:8,vacu:3,nucl:1,extr:1,E.R.:1	PlasmaMembrane	PlasmaMembrane
SeqID: ThzLecRLK-G-type-140	plas:10.5,golg_plas:6,nucl:2,chlo:1	PlasmaMembrane	PlasmaMembrane
SeqID: ThzLecRLK-G-type-141	vacu:8,golg:4,nucl:1,plas:1	PlasmaMembrane	PlasmaMembrane
SeqID: ThzLecRLK-G-type-142	nucl:4.5,chlo:4,cysk_nucl:3,plas:2,cyto:1,mito:1,vacu:1	PlasmaMembrane	PlasmaMembrane
SeqID: ThzLecRLK-G-type-143	nucl:3,extr:3,chlo:2,cyto:2,vacu:2,mito:1,plas:1	PlasmaMembrane	PlasmaMembrane
SeqID: ThzLecRLK-G-type-144	extr:4,nucl:3,plas:2,vacu:2,chlo:1,cyto:1,golg:1	PlasmaMembrane	PlasmaMembrane
SeqID: ThzLecRLK-G-type-145	chlo:4,nucl:3.5,cysk_nucl:2.5,cyto:2,plas:2,mito:1,E.R.:1	PlasmaMembrane Lysosoma	PlasmaMembrane
SeqID: ThzLecRLK-G-type-146	plas:6,vacu:4,E.R.:2,nucl:1,extr:1	PlasmaMembrane	PlasmaMembrane
SeqID: ThzLecRLK-G-type-147	plas:9,nucl:2,vacu:2,extr:1	PlasmaMembrane	PlasmaMembrane
SeqID: ThzLecRLK-G-type-148	cyto:4,E.R.:3.5,nucl:3,E.R._plas:3,plas:1.5,mito:1,vacu:1	PlasmaMembrane	PlasmaMembrane
SeqID: ThzLecRLK-G-type-149	plas:7,nucl:2,vacu:2,chlo:1,extr:1,E.R.:1	PlasmaMembrane	PlasmaMembrane
SeqID: ThzLecRLK-G-type-150	chlo:8,nucl:3,cyto:1,vacu:1,E.R.:1	PlasmaMembrane
SeqID: ThzLecRLK-G-type-151	chlo:7,nucl:3.5,cysk_nucl:2.5,mito:1,vacu:1,E.R.:1	PlasmaMembrane
SeqID: ThzLecRLK-G-type-152	plas:7,E.R.:3,mito:2,chlo:1,pero:1	PlasmaMembrane	PlasmaMembrane
SeqID: ThzLecRLK-G-type-153	plas:6,E.R.:3,mito:2,chlo:1,vacu:1,pero:1	PlasmaMembrane	PlasmaMembrane
SeqID: ThzLecRLK-G-type-154	plas:9.5,golg_plas:6.5,golg:2.5,vacu:2	PlasmaMembrane	PlasmaMembrane
SeqID: ThzLecRLK-G-type-155	extr:4,vacu:3,E.R.:2,golg:2,chlo:1,nucl:1,plas:1	Cytoplasmic Extracellular PlasmaMembrane	PlasmaMembrane Extracellular
SeqID: ThzLecRLK-L-type-1	plas:8,mito:2,nucl:1,vacu:1,E.R.:1,pero:1	PlasmaMembrane	PlasmaMembrane
SeqID: ThzLecRLK-L-type-2	plas:8,E.R.:3,nucl:2,vacu:1	PlasmaMembrane	PlasmaMembrane
SeqID: ThzLecRLK-L-type-3	plas:8,E.R.:4,nucl:1,vacu:1	PlasmaMembrane	PlasmaMembrane
SeqID: ThzLecRLK-L-type-4	plas:11,E.R.:2,vacu:1	PlasmaMembrane Cytoplasmic	PlasmaMembrane
SeqID: ThzLecRLK-L-type-5	vacu:4,mito:3,extr:2,golg:2,chlo:1,plas:1,E.R.:1	PlasmaMembrane	PlasmaMembrane
SeqID: ThzLecRLK-L-type-6	vacu:4,extr:3,E.R.:2,golg:2,chlo:1,mito:1,plas:1	PlasmaMembrane Extracellular	PlasmaMembrane Extracellular
SeqID: ThzLecRLK-L-type-7	extr:5,chlo:2,nucl:2,vacu:2,cyto:1,mito:1,E.R.:1	PlasmaMembrane
SeqID: ThzLecRLK-L-type-8	vacu:4,chlo:3,E.R.:3,plas:2,nucl:1,extr:1	PlasmaMembrane	PlasmaMembrane
SeqID: ThzLecRLK-L-type-9	plas:9,vacu:2,E.R.:2,golg:1	PlasmaMembrane	PlasmaMembrane
SeqID: ThzLecRLK-L-type-10	plas:8,golg:3,E.R.:2,vacu:1	PlasmaMembrane	PlasmaMembrane
SeqID: ThzLecRLK-L-type-11	vacu:4,plas:3,E.R.:3,chlo:1,nucl:1,mito:1,extr:1	PlasmaMembrane Chloroplast	PlasmaMembrane Chloroplast
SeqID: ThzLecRLK-L-type-12	golg:5,E.R.:4,plas:3,vacu:2	PlasmaMembrane	PlasmaMembrane
SeqID: ThzLecRLK-L-type-13	vacu:4,cyto:3,mito:2,E.R.:2,chlo:1,plas:1,extr:1	Cytoplasmic PlasmaMembrane	PlasmaMembrane Cytoplasmic
SeqID: ThzLecRLK-L-type-14	plas:10,vacu:2,E.R.:2	Cytoplasmic Chloroplast
SeqID: ThzLecRLK-L-type-15	vacu:8,mito:2,extr:2,nucl:1,golg:1	PlasmaMembrane
SeqID: ThzLecRLK-L-type-16	chlo:6,plas:3,E.R.:2,nucl:1,mito:1,vacu:1	Cytoplasmic
SeqID: ThzLecRLK-L-type-17	plas:12,vacu:1,E.R.:1	Cytoplasmic PlasmaMembrane	PlasmaMembrane
SeqID: ThzLecRLK-L-type-18	plas:4,mito:2,E.R.:2,golg:2,chlo:1,extr:1,vacu:1,pero:1	Extracellular	Extracellular
SeqID: ThzLecRLK-L-type-19	plas:9,E.R.:2,chlo:1,vacu:1,pero:1	PlasmaMembrane	PlasmaMembrane
SeqID: ThzLecRLK-L-type-20	chlo:7,nucl:4,mito:1,vacu:1,E.R.:1	Chloroplast PlasmaMembrane	Chloroplast
SeqID: ThzLecRLK-L-type-21	plas:8,E.R.:2,chlo:1,nucl:1,vacu:1,golg:1	PlasmaMembrane	PlasmaMembrane
SeqID: ThzLecRLK-L-type-22	vacu:4,extr:3,golg:2,chlo:1,nucl:1,mito:1,plas:1,E.R.:1	PlasmaMembrane Chloroplast	PlasmaMembrane
SeqID: ThzLecRLK-L-type-23	plas:10,E.R.:2,chlo:1,pero:1	PlasmaMembrane	PlasmaMembrane
SeqID: ThzLecRLK-L-type-24	vacu:5,extr:3,golg:2,chlo:1,mito:1,plas:1,E.R.:1	PlasmaMembrane	PlasmaMembrane
SeqID: ThzLecRLK-L-type-25	plas:12,vacu:1,E.R.:1	PlasmaMembrane	PlasmaMembrane
SeqID: ThzLecRLK-L-type-26	chlo:4,mito:3,nucl:2,cyto:2,plas:1,E.R.:1,golg:1	PlasmaMembrane	PlasmaMembrane
SeqID: ThzLecRLK-L-type-27	plas:13,vacu:1	PlasmaMembrane	PlasmaMembrane
SeqID: ThzLecRLK-L-type-28	plas:10,vacu:2,E.R.:1,golg:1	PlasmaMembrane	PlasmaMembrane
SeqID: ThzLecRLK-L-type-29	plas:11,vacu:2,E.R.:1	PlasmaMembrane	PlasmaMembrane
SeqID: ThzLecRLK-L-type-30	vacu:7,mito:2,nucl:1,cyto:1,plas:1,extr:1,golg:1	PlasmaMembrane	PlasmaMembrane
SeqID: ThzLecRLK-L-type-31	vacu:4,extr:3,golg:2,chlo:1,cyto:1,mito:1,plas:1,E.R.:1	PlasmaMembrane Extracellular	PlasmaMembrane Extracellular
SeqID: ThzLecRLK-L-type-32	E.R.:4,cyto:3,nucl:2,plas:2,chlo:1,mito:1,vacu:1	Chloroplast	Chloroplast
SeqID: ThzLecRLK-L-type-33	cyto:5,E.R.:4,plas:2,chlo:1,nucl:1,vacu:1	PlasmaMembrane	PlasmaMembrane
SeqID: ThzLecRLK-L-type-34	chlo:6,mito:2,vacu:2,cyto:1,plas:1,extr:1,golg:1	PlasmaMembrane	PlasmaMembrane
SeqID: ThzLecRLK-L-type-35	chlo:3,mito:3,vacu:3,plas:2,cyto:1,extr:1,golg:1	PlasmaMembrane	PlasmaMembrane
SeqID: ThzLecRLK-L-type-36	cyto:5,E.R.:4,vacu:2,chlo:1,mito:1,plas:1	PlasmaMembrane	PlasmaMembrane
SeqID: ThzLecRLK-L-type-37	plas:9,E.R.:3,vacu:1,golg:1	PlasmaMembrane	PlasmaMembrane
SeqID: ThzLecRLK-L-type-38	plas:11,vacu:2,golg:1	PlasmaMembrane	PlasmaMembrane
SeqID: ThzLecRLK-L-type-39	plas:11,vacu:2,golg:1	PlasmaMembrane	PlasmaMembrane
SeqID: ThzLecRLK-L-type-40	vacu:6,extr:3,golg:2,chlo:1,plas:1,E.R.:1	PlasmaMembrane	PlasmaMembrane
SeqID: ThzLecRLK-L-type-41	plas:11,vacu:1,E.R.:1,pero:1	PlasmaMembrane	PlasmaMembrane
SeqID: ThzLecRLK-L-type-42	plas:10,E.R.:2,mito:1,pero:1	PlasmaMembrane	PlasmaMembrane
SeqID: ThzLecRLK-L-type-43	plas:8,E.R.:3,mito:2,pero:1	PlasmaMembrane	PlasmaMembrane
SeqID: ThzLecRLK-L-type-44	plas:13,E.R.:1	PlasmaMembrane	PlasmaMembrane
SeqID: ThzLecRLK-L-type-45	vacu:7,golg:2,chlo:1,mito:1,plas:1,extr:1,E.R.:1	PlasmaMembrane	PlasmaMembrane
SeqID: ThzLecRLK-L-type-46	plas:7,E.R.:3,mito:2,vacu:1,pero:1	PlasmaMembrane	PlasmaMembrane
SeqID: ThzLecRLK-L-type-47	vacu:6,golg:3,extr:2,chlo:1,mito:1,plas:1	PlasmaMembrane	PlasmaMembrane
SeqID: ThzLecRLK-L-type-48	chlo:4,plas:3,nucl:2.5,vacu:2,cysk_nucl:2,mito:1,extr:1	PlasmaMembrane	PlasmaMembrane
SeqID: ThzLecRLK-L-type-49	plas:11,vacu:1,E.R.:1,pero:1	PlasmaMembrane	PlasmaMembrane
SeqID: ThzLecRLK-L-type-50	chlo:6,mito:3,E.R.:2,nucl:1,plas:1,vacu:1	Chloroplast PlasmaMembrane	PlasmaMembrane Chloroplast
SeqID: ThzLecRLK-L-type-51	chlo:6,mito:3,nucl:2,plas:1,vacu:1,E.R.:1	PlasmaMembrane Chloroplast	PlasmaMembrane Chloroplast
SeqID: ThzLecRLK-L-type-52	vacu:6,extr:2,golg:2,chlo:1,nucl:1,mito:1,plas:1	PlasmaMembrane	PlasmaMembrane
SeqID: ThzLecRLK-L-type-53	chlo:12,nucl:1,extr:1	PlasmaMembrane Chloroplast	Chloroplast
SeqID: ThzLecRLK-L-type-54	plas:11,E.R.:2,pero:1	PlasmaMembrane	PlasmaMembrane
SeqID: ThzLecRLK-L-type-55	plas:13,E.R.:1	PlasmaMembrane	PlasmaMembrane
SeqID: ThzLecRLK-L-type-56	plas:9,E.R.:2,chlo:1,vacu:1,pero:1	PlasmaMembrane	PlasmaMembrane
SeqID: ThzLecRLK-L-type-57	plas:11,E.R.:3	PlasmaMembrane	PlasmaMembrane
SeqID: ThzLecRLK-L-type-58	cyto:5,E.R.:5,chlo:1,nucl:1,mito:1,vacu:1	PlasmaMembrane Cytoplasmic Chloroplast	Cytoplasmic Chloroplast
SeqID: ThzLecRLK-L-type-59	plas:11,E.R.:3	PlasmaMembrane Chloroplast	PlasmaMembrane
SeqID: ThzLecRLK-L-type-60	vacu:5,chlo:2,mito:2,nucl:1,cyto:1,plas:1,extr:1,E.R.:1	PlasmaMembrane Chloroplast	PlasmaMembrane Chloroplast
SeqID: ThzLecRLK-L-type-61	plas:9,E.R.:2,chlo:1,vacu:1,pero:1	PlasmaMembrane	PlasmaMembrane
SeqID: ThzLecRLK-L-type-62	plas:10.5,cyto_plas:6,E.R.:3	PlasmaMembrane	PlasmaMembrane
SeqID: ThzLecRLK-L-type-63	cyto:6.5,cyto_nucl:4,E.R.:3,vacu:2,mito:1,golg:1	Cytoplasmic ER	Cytoplasmic ER
SeqID: ThzLecRLK-L-type-64	cyto:6,E.R.:4,chlo:1,nucl:1,plas:1,vacu:1	Cytoplasmic	Cytoplasmic
SeqID: ThzLecRLK-L-type-65	chlo:4,vacu:4,nucl:1,mito:1,plas:1,extr:1,E.R.:1,golg:1	PlasmaMembrane Chloroplast	PlasmaMembrane Chloroplast
SeqID: ThzLecRLK-L-type-66	vacu:6,chlo:3,extr:2,nucl:1,E.R.:1,golg:1	Chloroplast	Chloroplast
SeqID: ThzLecRLK-L-type-67	vacu:4,extr:3,E.R.:3,chlo:1,cyto:1,mito:1,plas:1	Cytoplasmic Chloroplast	Cytoplasmic Chloroplast
SeqID: ThzLecRLK-L-type-68	cyto:5,E.R.:4,chlo:2,nucl:1,mito:1,vacu:1	Cytoplasmic	Cytoplasmic
SeqID: ThzLecRLK-L-type-69	E.R.:5,extr:2,golg:2,chlo:1,cyto:1,mito:1,plas:1,vacu:1	Cytoplasmic	Cytoplasmic
SeqID: ThzLecRLK-L-type-70	vacu:5,chlo:3,nucl:1,mito:1,plas:1,extr:1,E.R.:1,golg:1	Mitochondrial	Mitochondrial
SeqID: ThzLecRLK-L-type-71	vacu:7,cyto:2,mito:2,extr:2,nucl:1	PlasmaMembrane
SeqID: ThzLecRLK-L-type-72	chlo:4,mito:4,cyto:2,plas:1,extr:1,vacu:1,E.R.:1	Cytoplasmic Chloroplast	Cytoplasmic Chloroplast
SeqID: ThzLecRLK-L-type-73	chlo:11,mito:2,cyto:1	PlasmaMembrane
SeqID: ThzLecRLK-L-type-74	cyto:4,E.R.:4,vacu:3,chlo:1,nucl:1,plas:1	Cytoplasmic	Cytoplasmic
SeqID: ThzLecRLK-L-type-75	plas:9,E.R.:3,mito:1,pero:1	PlasmaMembrane	PlasmaMembrane
SeqID: ThzLecRLK-L-type-76	extr:3,E.R.:3,nucl:2,mito:2,golg:2,chlo:1,plas:1	PlasmaMembrane	PlasmaMembrane
SeqID: ThzLecRLK-L-type-77	plas:12,E.R.:2	PlasmaMembrane	PlasmaMembrane
SeqID: ThzLecRLK-L-type-78	extr:4,E.R.:2,golg:2,chlo:1,nucl:1,cyto:1,mito:1,plas:1,vacu:1	PlasmaMembrane	PlasmaMembrane
SeqID: ThzLecRLK-L-type-79	cyto:4,E.R.:3,chlo:2,nucl:2,vacu:2,plas:1	Chloroplast	Chloroplast
SeqID: ThzLecRLK-L-type-80	nucl:12,extr:2	PlasmaMembrane
SeqID: ThzLecRLK-L-type-81	vacu:6,mito:3,golg:2,nucl:1,plas:1,extr:1	PlasmaMembrane	PlasmaMembrane
SeqID: ThzLecRLK-L-type-82	chlo:4,nucl:4,plas:3,cyto:1,vacu:1,E.R.:1	Chloroplast PlasmaMembrane	PlasmaMembrane Chloroplast
SeqID: ThzLecRLK-L-type-83	chlo:4,plas:3,nucl:2,E.R.:2,cyto:1,mito:1,vacu:1	Chloroplast Cytoplasmic	Chloroplast Cytoplasmic
SeqID: ThzLecRLK-L-type-84	extr:5,vacu:3,mito:2,E.R.:2,nucl:1,plas:1	PlasmaMembrane Chloroplast	PlasmaMembrane
SeqID: ThzLecRLK-L-type-85	nucl:3,cyto:3,vacu:3,plas:2,E.R.:2,chlo:1	PlasmaMembrane Cytoplasmic	PlasmaMembrane Cytoplasmic
SeqID: ThzLecRLK-L-type-86	extr:4,vacu:3,E.R.:2,golg:2,chlo:1,mito:1,plas:1	Cytoplasmic
SeqID: ThzLecRLK-L-type-87	plas:11,vacu:1,E.R.:1,golg:1	PlasmaMembrane	PlasmaMembrane
SeqID: ThzLecRLK-L-type-88	vacu:8,golg:3,nucl:1,plas:1,extr:1	PlasmaMembrane	PlasmaMembrane
SeqID: ThzLecRLK-L-type-89	chlo:4,cyto:3,plas:3,nucl:2,mito:1,vacu:1	PlasmaMembrane	PlasmaMembrane
SeqID: ThzLecRLK-L-type-90	chlo:4,cyto:3,vacu:3,plas:2,nucl:1,extr:1	PlasmaMembrane	PlasmaMembrane
SeqID: ThzLecRLK-L-type-91	plas:8,chlo:2,mito:2,nucl:1,pero:1	PlasmaMembrane	PlasmaMembrane
SeqID: ThzLecRLK-L-type-92	plas:11,vacu:2,E.R.:1	PlasmaMembrane	PlasmaMembrane
SeqID: ThzLecRLK-L-type-93	chlo:12,nucl:1,mito:1	PlasmaMembrane
SeqID: ThzLecRLK-L-type-94	plas:10,chlo:1,nucl:1,vacu:1,E.R.:1	PlasmaMembrane	PlasmaMembrane
SeqID: ThzLecRLK-L-type-95	nucl:12,extr:2	PlasmaMembrane
SeqID: ThzLecRLK-L-type-96	vacu:4,extr:3,mito:2,E.R.:2,golg:2,plas:1	Extracellular PlasmaMembrane	PlasmaMembrane Extracellular
SeqID: ThzLecRLK-L-type-97	plas:6,nucl:3,E.R.:3,vacu:2	PlasmaMembrane	PlasmaMembrane
SeqID: ThzLecRLK-L-type-98	vacu:6,extr:2,golg:2,chlo:1,mito:1,plas:1,E.R.:1	PlasmaMembrane	PlasmaMembrane
SeqID: ThzLecRLK-L-type-99	plas:8,E.R.:3,golg:2,vacu:1	PlasmaMembrane	PlasmaMembrane
SeqID: ThzLecRLK-L-type-100	mito:4,vacu:3,chlo:2,plas:2,cyto:1,extr:1,golg:1	PlasmaMembrane	PlasmaMembrane
SeqID: ThzLecRLK-L-type-101	chlo:3,nucl:3,vacu:3,plas:2,cyto:1,extr:1,E.R.:1	PlasmaMembrane	PlasmaMembrane
SeqID: ThzLecRLK-L-type-102	plas:12,vacu:1,E.R.:1	PlasmaMembrane Chloroplast	PlasmaMembrane
SeqID: ThzLecRLK-L-type-103	vacu:6,chlo:2,extr:2,golg:2,nucl:1,mito:1	PlasmaMembrane
SeqID: ThzLecRLK-L-type-104	chlo:9,extr:2,vacu:2,golg:1	PlasmaMembrane
SeqID: ThzLecRLK-L-type-105	chlo:5,extr:4,nucl:2.5,cysk_nucl:2,cyto:1,mito:1	PlasmaMembrane
SeqID: ThzLecRLK-L-type-106	plas:8,mito:2,E.R.:2,nucl:1,pero:1	PlasmaMembrane	PlasmaMembrane
SeqID: ThzLecRLK-L-type-107	plas:9,vacu:2,golg:2,E.R.:1	PlasmaMembrane	PlasmaMembrane
SeqID: ThzLecRLK-L-type-108	plas:9,vacu:2,E.R.:2,nucl:1	PlasmaMembrane	PlasmaMembrane
SeqID: ThzLecRLK-L-type-109	plas:9,E.R.:3,mito:1,pero:1	PlasmaMembrane	PlasmaMembrane
SeqID: ThzLecRLK-L-type-110	plas:10,E.R.:2,vacu:1,golg:1	PlasmaMembrane	PlasmaMembrane
SeqID: ThzLecRLK-L-type-111	extr:4,plas:2,E.R.:2,golg:2,chlo:1,nucl:1,mito:1,vacu:1	PlasmaMembrane	PlasmaMembrane
SeqID: ThzLecRLK-L-type-112	nucl:12,extr:2	PlasmaMembrane
SeqID: ThzLecRLK-L-type-113	vacu:7,golg:2,chlo:1,cyto:1,plas:1,extr:1,E.R.:1	PlasmaMembrane	PlasmaMembrane
SeqID: ThzLecRLK-L-type-114	vacu:5,chlo:3,nucl:1,mito:1,plas:1,extr:1,E.R.:1,golg:1	PlasmaMembrane	PlasmaMembrane
SeqID: ThzLecRLK-L-type-115	plas:11,vacu:2,E.R.:1	Cytoplasmic Chloroplast
SeqID: ThzLecRLK-L-type-116	cyto:5,nucl:3,E.R.:3,vacu:2,chlo:1	Chloroplast Cytoplasmic	Chloroplast Cytoplasmic
SeqID: ThzLecRLK-L-type-117	nucl:4,cyto:4,vacu:2,E.R.:2,chlo:1,plas:1	PlasmaMembrane	PlasmaMembrane
SeqID: ThzLecRLK-L-type-118	chlo:5,nucl:2,plas:2,extr:2,vacu:2,cyto:1	Chloroplast	Chloroplast
SeqID: ThzLecRLK-L-type-119	vacu:5,extr:2,golg:2,chlo:1,cyto:1,mito:1,plas:1,E.R.:1	Chloroplast	Chloroplast
SeqID: ThzLecRLK-L-type-120	E.R.:5,cyto:2,plas:2,extr:2,chlo:1,nucl:1,vacu:1	Cytoplasmic	Cytoplasmic
SeqID: ThzLecRLK-L-type-121	vacu:4,E.R.:3,golg:2,chlo:1,nucl:1,mito:1,plas:1,extr:1	PlasmaMembrane	PlasmaMembrane
SeqID: ThzLecRLK-L-type-122	plas:11,nucl:2,vacu:1	PlasmaMembrane	PlasmaMembrane
SeqID: ThzLecRLK-L-type-123	plas:12,vacu:2	PlasmaMembrane	PlasmaMembrane
SeqID: ThzLecRLK-L-type-124	plas:5,vacu:5,E.R.:2,chlo:1,golg:1	PlasmaMembrane	PlasmaMembrane
SeqID: ThzLecRLK-L-type-125	plas:11,vacu:1,E.R.:1,golg:1	Chloroplast PlasmaMembrane	PlasmaMembrane
SeqID: ThzLecRLK-L-type-126	chlo:4,nucl:3.5,cysk_nucl:2.5,cyto:2,plas:2,mito:1,extr:1	PlasmaMembrane	PlasmaMembrane
SeqID: ThzLecRLK-L-type-127	extr:5,chlo:3,vacu:3,nucl:1,cyto:1,plas:1	PlasmaMembrane	PlasmaMembrane
SeqID: ThzLecRLK-L-type-128	cyto:4,E.R.:4,vacu:2,chlo:1,nucl:1,mito:1,plas:1	PlasmaMembrane	PlasmaMembrane
SeqID: ThzLecRLK-L-type-129	E.R.:4.5,E.R._plas:3.5,cyto:3,vacu:2,plas:1.5,chlo:1,nucl:1,mito:1	PlasmaMembrane	PlasmaMembrane
SeqID: ThzLecRLK-L-type-130	vacu:7,mito:2,golg:2,chlo:1,plas:1,extr:1	PlasmaMembrane	PlasmaMembrane
SeqID: ThzLecRLK-L-type-131	nucl:4,vacu:3,chlo:2,E.R.:2,golg:2,cyto:1	PlasmaMembrane
SeqID: ThzLecRLK-L-type-132	plas:4,vacu:3,chlo:2,mito:2,E.R.:2,pero:1	PlasmaMembrane	PlasmaMembrane
SeqID: ThzLecRLK-L-type-133	vacu:8,golg:2,nucl:1,mito:1,plas:1,extr:1	PlasmaMembrane	PlasmaMembrane
SeqID: ThzLecRLK-L-type-134	plas:4.5,E.R._plas:4,cyto:3,E.R.:2.5,nucl:2,mito:1,vacu:1	PlasmaMembrane Chloroplast Cytoplasmic	PlasmaMembrane Chloroplast
SeqID: ThzLecRLK-L-type-135	extr:4,E.R.:4,cyto:3,chlo:1,mito:1,vacu:1	Chloroplast	Chloroplast
SeqID: ThzLecRLK-L-type-136	vacu:6,plas:5,mito:1,extr:1,E.R.:1	PlasmaMembrane	PlasmaMembrane
SeqID: ThzLecRLK-L-type-137	chlo:11,mito:2,cyto:1	PlasmaMembrane
SeqID: ThzLecRLK-L-type-138	vacu:7,golg:2,chlo:1,nucl:1,mito:1,plas:1,E.R.:1	PlasmaMembrane	PlasmaMembrane
SeqID: ThzLecRLK-L-type-139	plas:7,vacu:4,E.R.:2,nucl:1	PlasmaMembrane Vacuole	PlasmaMembrane Vacuole
SeqID: ThzLecRLK-L-type-140	cyto:5,nucl:3,E.R.:3,vacu:2,chlo:1	PlasmaMembrane Chloroplast	Chloroplast
