# Supplementary material for: Identification and functional analysis of LecRLK genes in Taxodium ‘Zhongshanshan’
Source: PeerJ. 2019 Aug 13;7:e7498. doi: 10.7717/peerj.7498 (PMC6697044; doi:10.7717/peerj.7498)
Supplement: File S9 — RNA-seq data were collected from the transcriptome study T. hybrid ‘Zhongshanshan’ under waterlogging stress and salt stress by the next-generation secquencing. [file peerj-07-7498-s009.xlsx]

## Sheet: TF.sta.fig
TF	TF Number
MYB	28
ERF	19
C2H2	19
bHLH	14
GRAS	10
NAC	9
MYB_related	9
C3H	9
Trihelix	8
G2-like	8
Dof	8
bZIP	8
WRKY	7
HD-ZIP	6
ZF-HD	5
TALE	5
LBD	4
GATA	4
AP2	4
SBP	3
NF-YC	3
NF-YB	3
HB-other	3
EIL	3
ARF	3
TCP	2
Nin-like	2
NF-YA	2
NF-X1	2
GeBP	2
BES1	2
B3	2
ARR-B	2
WOX	1
VOZ	1
SRS	1
S1Fa-like	1
RAV	1
LSD	1
GRF	1
DBB	1
CPP	1
CO-like	1
CAMTA	1
BBR-BPC	1
Total	230

## Sheet: LecRLK list
ThzLecRLK-L-type93		ThzLecRLK-L-type92		ThzLecRLK-L-type90		ThzLecRLK-L-type88		ThzLecRLK-L-type87		ThzLecRLK-L-type86		ThzLecRLK-L-type7		ThzLecRLK-L-type16		ThzLecRLK-L-type128		ThzLecRLK-L-type125		ThzLecRLK-L-type115		ThzLecRLK-L-type109		ThzLecRLK-L-type107		ThzLecRLK-L-type102		ThzLecRLK-G-type98		ThzLecRLK-G-type90		ThzLecRLK-G-type82		ThzLecRLK-G-type79		ThzLecRLK-G-type39		ThzLecRLK-G-type101
ARR-B	1	ERF	1	bHLH	2	AP2	2	B3	1	ARF	2	bHLH	1	ARF	1	ARR-B	1	ARF	1	MYB	2	MYB	1	ARR-B	1	C2H2	1	ARF	1	GRAS	2	ARF	1	AP2	2	AP2	2	SBP	1
BBR-BPC	1	HD-ZIP	1	C3H	1	ARR-B	1	bHLH	2	ARR-B	1	bZIP	1	B3	1	BBR-BPC	1	ARR-B	1					BES1	1	SBP	1	B3	1	TALE	2	B3	1	bHLH	3	bHLH	2
BES1	1	LBD	1	CO-like	1	BBR-BPC	1	bZIP	1	BES1	1	C2H2	2	bHLH	1	bHLH	5	bZIP	1					bHLH	1		2	bHLH	1		4	bHLH	1	bZIP	1	bZIP	1
bHLH	1	WRKY	1	Dof	1	BES1	1	C2H2	1	bHLH	2	G2-like	1	C2H2	5	bZIP	5	C2H2	1					C2H2	2			C2H2	5			C2H2	5	C2H2	2	C2H2	4
bZIP	1		4	ERF	2	bHLH	4	Dof	2	bZIP	2	GATA	1	ERF	1	C2H2	4	Dof	1					Dof	1			ERF	1			ERF	1	C3H	1	Dof	1
C2H2	1			G2-like	1	C2H2	2	ERF	6	C2H2	4	GRAS	1	GeBP	1	C3H	8	EIL	1					EIL	1			GeBP	1			GeBP	1	Dof	1	ERF	1
C3H	4			GRAS	1	C3H	2	G2-like	1	C3H	3	GRF	1	MYB	1	CAMTA	1	G2-like	1					ERF	2			LBD	1			MYB	1	ERF	1	G2-like	1
ERF	2			HD-ZIP	1	Dof	2	GATA	1	CAMTA	1	MYB	3	MYB_related	1	CPP	1	GeBP	1					GeBP	1			MYB	2			MYB_related	1	G2-like	1	GATA	1
G2-like	2			MYB	2	EIL	1	GRAS	1	DBB	1	WRKY	1	NF-X1	1	DBB	1	GRAS	2					GRAS	2			MYB_related	1			NF-X1	1	GRAS	1	GRAS	1
GRAS	1			NF-YC	2	ERF	3	HD-ZIP	3	Dof	1	ZF-HD	1	Trihelix	1	Dof	2	HB-other	1					HD-ZIP	1			NF-X1	1			Trihelix	1	LBD	1	GRF	1
HB-other	1			Nin-like	1	G2-like	2	LBD	1	EIL	3		13		14	EIL	2	MYB	1					MYB	4				15				14	MYB	4	LBD	1
LSD	1			Trihelix	1	GATA	1	MYB	4	ERF	3					ERF	3	MYB_related	1					NAC	1									MYB_related	1	MYB	4
MYB	3				16	GRAS	1	MYB_related	1	G2-like	1					G2-like	4	NAC	1					NF-YA	2									NAC	2	WRKY	2
MYB_related	4					HB-other	1	NAC	2	GATA	2					GATA	2	NF-YA	2					NF-YB	1									NF-YC	1	ZF-HD	1
NF-YB	1					HD-ZIP	2	WRKY	1	GeBP	1					GRAS	2	NF-YB	1					Nin-like	1									Trihelix	1		23
NF-YC	1					LBD	1		28	GRAS	4					HB-other	2	Nin-like	1						22									WRKY	1
SBP	1					LSD	1			HB-other	1					LBD	1	Trihelix	1															ZF-HD	1
SRS	1					MYB	2			MYB	5					LSD	1	ZF-HD	2																25
Trihelix	3					MYB_related	4			MYB_related	1					MYB	6		21
VOZ	1					NAC	3			NAC	1					MYB_related	4
WRKY	1					SBP	1			NF-YA	1					NAC	2
ZF-HD	1					Trihelix	4			NF-YB	2					NF-X1	1
	34					VOZ	1			NF-YC	1					NF-YB	2
						WRKY	2			RAV	1					NF-YC	2
						ZF-HD	1			SBP	1					RAV	1
							46			TALE	2					S1Fa-like	1
										TCP	1					SBP	1
										Trihelix	1					SRS	1
										WOX	1					TALE	2
										WRKY	1					TCP	2
										ZF-HD	1					Trihelix	6
											53					WRKY	3
																ZF-HD	2
																	82

## Sheet: Total
Gene	TF Number
ThzLecRLK-G-type101	1
ThzLecRLK-G-type39	23
ThzLecRLK-G-type79	25
ThzLecRLK-G-type82	14
ThzLecRLK-G-type90	4
ThzLecRLK-G-type98	15
ThzLecRLK-L-type102	2
ThzLecRLK-L-type107	22
ThzLecRLK-L-type109	1
ThzLecRLK-L-type115	2
ThzLecRLK-L-type125	21
ThzLecRLK-L-type128	82
ThzLecRLK-L-type16	14
ThzLecRLK-L-type7	13
ThzLecRLK-L-type86	53
ThzLecRLK-L-type87	28
ThzLecRLK-L-type88	46
ThzLecRLK-L-type90	16
ThzLecRLK-L-type92	4
ThzLecRLK-L-type93	34
